# Supplementary material
Source: PubMed Central journal article supplement (PMC2747217)
Supplement: 0902000106_ST1_PDF.pdf [file 0902000106_ST1_PDF.pdf]

**Table S1. Genome features of the ten sequenced *Shewanella* organisms used in the study**

| Species or strain                 | Genome Size <sup>a</sup>                                      | Number of genes | Protein coding genes (%coding) | tRNAs & rRNAs | Partially shared genes <sup>b</sup> (%) | Strain specific genes <sup>b</sup> (%) | Accession Number      |
|-----------------------------------|---------------------------------------------------------------|-----------------|--------------------------------|---------------|-----------------------------------------|----------------------------------------|-----------------------|
| <i>S. oneidensis</i> MR1          | 5,131,416                                                     | 4,561;<br>184   | 4,318 (83);<br>149 (69)        | 130           | 1,401<br>(33.4)                         | 628 (14.9)                             | AE014299;<br>AE014300 |
| <i>S. sp.</i> W3-18-1             | 4,708,380                                                     | 4,217           | 4,044 (85)                     | 129           | 1,624<br>(40.1)                         | 258 (6.4)                              | CP000503              |
| <i>S. putrefaciens</i> CN-32      | 4,659,620                                                     | 4,134           | 3,972 (85)                     | 129           | 1,623<br>(40.9)                         | 180 (4.5)                              | CP000681              |
| <i>S. sp.</i> MR-7                | 4,799,109                                                     | 4,178;<br>8     | 4,006 (85);<br>8 (56)          | 144           | 1,691<br>(42.4)                         | 162 (4.0)                              | CP000444;<br>CP000445 |
| <i>S. sp.</i> MR-4                | 4,706,287                                                     | 4,084           | 3,924 (85)                     | 141           | 1,661<br>(42.4)                         | 91 (2.3)                               | CP000446              |
| <i>S. sp.</i> ANA-3               | 5,251,146                                                     | 4,268;<br>251   | 4111 (85);<br>249 (83)         | 135           | 1,762<br>(40.3)                         | 442 (10.1)                             | CP000469;<br>CP000470 |
| <i>S. denitrificans</i> OS217     | 4,545,906                                                     | 3,905           | 3,754 (84)                     | 127           | 737<br>(19.7)                           | 827 (22.2)                             | CP000302              |
| <i>S. frigidimarina</i> NCIMB400  | 4,845,257                                                     | 4,199           | 4,029 (84)                     | 133           | 1,097<br>(27.5)                         | 726 (18.2)                             | CP000447              |
| <i>S. loihica</i> PV-4            | 4,602,594                                                     | 3,993           | 3,859 (85)                     | 124           | 1,196<br>(30.9)                         | 494 (12.8)                             | CP000606              |
| <i>S. amazonensis</i> SB2B        | 4,306,142                                                     | 3,785           | 3,645 (88)                     | 130           | 1,250<br>(32.4)                         | 440 (11.4)                             | CP000507              |
| <b>Isolate</b>                    | <b>Place of isolation</b>                                     |                 |                                |               |                                         |                                        |                       |
| <i>S. oneidensis</i> MR-1         | Freshwater sediments, Lake Oneida, NY, USA                    |                 |                                |               |                                         |                                        |                       |
| <i>Shewanella sp.</i> W3-18-1     | Marine sediments, Pacific Ocean (630 m, 5-6 cm core), WA, USA |                 |                                |               |                                         |                                        |                       |
| <i>S. putrefaciens</i> CN-32      | Subsurface sandstone, New Mexico, NM, USA                     |                 |                                |               |                                         |                                        |                       |
| <i>Shewanella sp.</i> MR-7        | 60 m depth, anoxic, Black Sea                                 |                 |                                |               |                                         |                                        |                       |
| <i>Shewanella sp.</i> MR-4        | 5 m depth, oxic, Black Sea                                    |                 |                                |               |                                         |                                        |                       |
| <i>Shewanella sp.</i> ANA-3       | Arsenic treated wood in brackish estuary, Woods Hole, MA, USA |                 |                                |               |                                         |                                        |                       |
| <i>S. denitrificans</i> OS217     | Marine oxic/anoxic zone, Gotland Deep, Baltic Sea             |                 |                                |               |                                         |                                        |                       |
| <i>S. frigidimarina</i> NCIMB 400 | Marine, North Sea, UK                                         |                 |                                |               |                                         |                                        |                       |
| <i>S. loihica</i> PV-4            | Marine, Naha Vents, Hawaii                                    |                 |                                |               |                                         |                                        |                       |
| <i>S. amazonensis</i> SB2B        | Marine sediments, Amazon River delta, Brazil                  |                 |                                |               |                                         |                                        |                       |

<sup>a</sup> Genome size was computed as the sum of chromosome and plasmid.

<sup>b</sup> Only orthologous genes outside of the core were considered in this analysis.
